# Supplementary material for: Exploring the Antifungal Potential of Arginine in Controlling Chestnut Rot Disease
Source: Research Square preprint supplement (doi:10.21203/rs.3.rs-6207660/v1), 2025-04-14
Supplement: Supplementary file 1 [file d5afd7392d46e7c5b3f99459.docx]

**Supplementary material**

| **Gene** |  | **5'--3'** |
| --- | --- | --- |
| *actin* | F | CATGAAGTGTGATGTCGATGTCC |
| R | CAGACGGAGTACTTTCGCTCG |
| *DN29494* | F | GCTGCACTGCCGTATCATTG |
| R | CTGCTGCTTGAACGCTTCG |
| *DN1711* | F | TCTCCTCGTCAACGCCATC |
| R | CCAGCAAGCAAGGTAGTTATGT |
| *DN7069* | F | TCGACTGGTTCAAGGATAGAGG |
| R | GAGGCAGGAGAGTAGCACATAT |
| *DN1795* | F | GATGTCGGCAATGGCAAGG |
| R | GATGGTAGCAGCAGCGTTC |
| *DN282* | F | TTGTTGGTGGTTGCCTATGTG |
| R | ACTGAGGTTGAGGAGCGATG |
| *DN6019* | F | CGTCACCAGCAAGTACAAGAA |
| R | GCGAGGAAGAGCGAGATCA |
| *DN4252* | F | TTGCCATCGCCACCACAT |
| R | GAAGACGCCCAGAAAGTAGAAG |
| *DN2957* | F | AACCACTCTCAACCACCTCTC |
| R | TGGCCTTGGAGAAGTACATCTT |
| *DN15761* | F | GTGACGCAGGACAAGAGAAC |
| R | GGATGATGAGGATAGAGCCGAA |
| *DN10881* | F | CTTCGCCGCCATCATATTCC |
| R | CCTTCCAGACGATCAGCATTG |
| *DN1864* | F | TACGAGCAAGGACTGGAGATTA |
| R | CGAGATGGATCACGGAGACT |
| *DN4898* | F | CACTCTCGTCTCCAGCCTTAT |
| R | GCAGCGGTCTTGAACTCCT |
| *DN1741* | F | GGCAGGAGCAGTACCACAT |
| R | GCGTGACCACTTATCATCTTCT |
| *DN2618* | F | AACCAGACCGACATCACTCAT |
| R | CTTAGGACCTCCACCAATCGT |
| *DN20386* | F | CTGGCTCTGTTCACATTCCTTC |
| R | AATGCTGCGGTGGCTGAT |

**Supplementary Table. 1** Target genes and the respective PCR primers

| **Sample** | **CleanData(bp)** | **GC(%)** | **Q30(%)** |
| --- | --- | --- | --- |
| Arg2.5-1 | 10,583,680,200 | 54.84% | 94.39% |
| Arg2.5-2 | 10,376,371,200 | 55.67% | 94.36% |
| Arg2.5-3 | 10,050,920,100 | 55.68% | 94.33% |
| Arg30-1 | 9,270,846,900 | 55.20% | 94.47% |
| Arg30-2 | 10,137,659,700 | 55.67% | 94.55% |
| Arg30-3 | 9,755,761,500 | 55.44% | 94.61% |
| CK-1 | 9,733,505,700 | 55.79% | 94.43% |
| CK-2 | 10,203,585,300 | 55.88% | 94.54% |
| CK-3 | 9,994,708,200 | 55.58% | 94.44% |

**Supplementary Table. 2** Base information statistics

| **Group** | **All DEG** | **Up** | **Down** |
| --- | --- | --- | --- |
| CK vs 2.5 mM | 3,370 | 1,934 | 1,436 |
| CK vs 30 mM | 1,112 | 573 | 539 |
| 2.5 mM vs 30 mM | 3,296 | 1,851 | 1,445 |

**Supplementary Table. 3** Differentially Expressed Genes (DEGs) Count Table


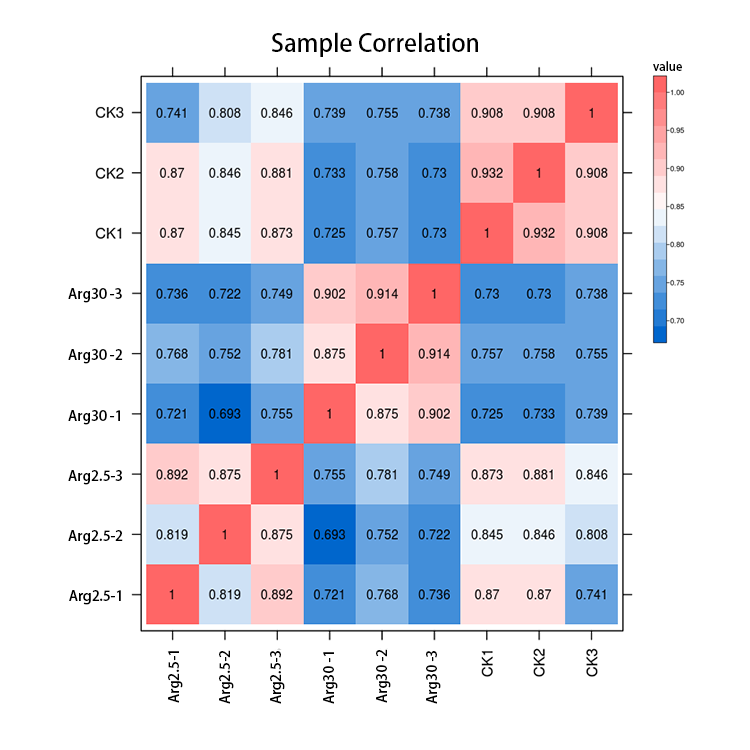


**Supplementary Fig. 1** Heat map of sample correlation
